# Supplementary material for: Direct Detection and Quantification of Neoantigens
Source: Oxford University Press journal article supplement (doi:10.1158/2326-6066.cir-19-0107), 2019-09-16
Supplement: 23266066cir190107-sup-217206_2_supp_5812593_pyrlbt.xlsx [file 23266066cir190107-sup-217206_2_supp_5812593_pyrlbt.xlsx]

## Sheet: Table S1
Supplementary Table S2. MANA-SRM parameters for all peptide targets.
Peptide ID	Peptide Sequence	Heavy or Light	Precursor Ion	Product Ion	Collision Energy	Cell Accelerator Voltage	Polarity	MANA-SRM fraction id	Ion Suppression by PEG derivatives?
K-Ras Internal Control	LVVVGAGGVGK	heavy	482.3	652.4	15	5	Positive	all	NO
K-Ras Internal Control	LVVVGAGGVGK	heavy	482.3	553.3	15	5	Positive	all	NO
K-Ras Internal Control	LVVVGAGGVGK	heavy	482.3	411.3	8	5	Positive	all	NO
K-Ras Internal Control	LVVVGAGGVGK	heavy	482.3	312.2	9	5	Positive	all	NO
K-Ras Internal Control	LVVVGAGGVGK	heavy	482.3	213.2	12	5	Positive	all	NO
K-Ras Internal Control	LVVVGAGGVGK	heavy	482.3	751.4	9	5	Positive	all	NO
peptide1	ILDTAGQEEY	heavy	573.275	311.124	8	5	Positive	6	NO
peptide1	ILDTAGQEEY	heavy	573.275	440.166	8	5	Positive	6	NO
peptide1	ILDTAGQEEY	heavy	573.275	521.304	8	5	Positive	6	NO
peptide1	ILDTAGQEEY	heavy	573.275	625.246	8	5	Positive	6	NO
peptide1	ILDTAGQEEY	heavy	573.275	706.384	8	5	Positive	6	NO
peptide1	ILDTAGQEEY	heavy	573.275	835.427	8	5	Positive	6	NO
peptide1	ILDTAGQEEY	light	569.767	311.124	8	5	Positive	6	NO
peptide1	ILDTAGQEEY	light	569.767	440.166	8	5	Positive	6	NO
peptide1	ILDTAGQEEY	light	569.767	514.287	8	5	Positive	6	NO
peptide1	ILDTAGQEEY	light	569.767	625.246	8	5	Positive	6	NO
peptide1	ILDTAGQEEY	light	569.767	699.367	8	5	Positive	6	NO
peptide1	ILDTAGQEEY	light	569.767	828.41	8	5	Positive	6	NO
peptide2	KLVVVGAGGV	heavy	452.797	238.143	8	5	Positive	9, 8	YES
peptide2	KLVVVGAGGV	heavy	452.797	366.202	8	5	Positive	9, 8	YES
peptide2	KLVVVGAGGV	heavy	452.797	440.323	8	5	Positive	9, 8	YES
peptide2	KLVVVGAGGV	heavy	452.797	465.27	12	5	Positive	9, 8	YES
peptide2	KLVVVGAGGV	heavy	452.797	539.392	8	5	Positive	9, 8	YES
peptide2	KLVVVGAGGV	heavy	452.797	564.338	8	5	Positive	9, 8	YES
peptide2	KLVVVGAGGV	heavy	452.797	781.493	8	5	Positive	9, 8	YES
peptide2	KLVVVGAGGV	light	449.79	232.129	8	5	Positive	9, 8	YES
peptide2	KLVVVGAGGV	light	449.79	360.188	8	5	Positive	9, 8	YES
peptide2	KLVVVGAGGV	light	449.79	440.323	8	5	Positive	9, 8	YES
peptide2	KLVVVGAGGV	light	449.79	459.256	12	5	Positive	9, 8	YES
peptide2	KLVVVGAGGV	light	449.79	539.391	8	5	Positive	9, 8	YES
peptide2	KLVVVGAGGV	light	449.79	558.325	8	5	Positive	9, 8	YES
peptide2	KLVVVGAGGV	light	449.79	781.493	8	5	Positive	9, 8	YES
peptide3	LVVVGAGGV	heavy	388.749	238.143	1	5	Positive	10, 9	YES
peptide3	LVVVGAGGV	heavy	388.749	312.228	1	5	Positive	10, 9	YES
peptide3	LVVVGAGGV	heavy	388.749	366.202	1	5	Positive	10, 9	YES
peptide3	LVVVGAGGV	heavy	388.749	411.297	1	5	Positive	10, 9	YES
peptide3	LVVVGAGGV	heavy	388.749	465.27	1	5	Positive	10, 9	YES
peptide3	LVVVGAGGV	heavy	388.749	539.355	1	5	Positive	10, 9	YES
peptide3	LVVVGAGGV	light	385.742	232.129	1	5	Positive	10, 9	YES
peptide3	LVVVGAGGV	light	385.742	312.228	1	5	Positive	10, 9	YES
peptide3	LVVVGAGGV	light	385.742	360.188	1	5	Positive	10, 9	YES
peptide3	LVVVGAGGV	light	385.742	411.297	1	5	Positive	10, 9	YES
peptide3	LVVVGAGGV	light	385.742	459.256	1	5	Positive	10, 9	YES
peptide3	LVVVGAGGV	light	385.742	539.355	1	5	Positive	10, 9	YES
peptide4	ITQLMPFGC	heavy	508.253	326.117	21	5	Positive	12	NO
peptide4	ITQLMPFGC	heavy	508.253	343.198	17	5	Positive	12	NO
peptide4	ITQLMPFGC	heavy	508.253	429.183	9	5	Positive	12	NO
peptide4	ITQLMPFGC	heavy	508.253	456.282	9	5	Positive	12	NO
peptide4	ITQLMPFGC	heavy	508.253	560.224	9	5	Positive	12	NO
peptide4	ITQLMPFGC	heavy	508.253	587.322	5	5	Positive	12	NO
peptide4	ITQLMPFGC	light	505.246	326.117	21	5	Positive	12	NO
peptide4	ITQLMPFGC	light	505.246	343.198	17	5	Positive	12	NO
peptide4	ITQLMPFGC	light	505.246	423.17	9	5	Positive	12	NO
peptide4	ITQLMPFGC	light	505.246	456.282	9	5	Positive	12	NO
peptide4	ITQLMPFGC	light	505.246	554.21	9	5	Positive	12	NO
peptide4	ITQLMPFGC	light	505.246	587.322	5	5	Positive	12	NO
peptide5	LITQLMPFGC	heavy	564.795	227.175	8	5	Positive	14	NO
peptide5	LITQLMPFGC	heavy	564.795	429.183	8	5	Positive	14	NO
peptide5	LITQLMPFGC	heavy	564.795	504.285	8	5	Positive	14	NO
peptide5	LITQLMPFGC	heavy	564.795	560.224	8	5	Positive	14	NO
peptide5	LITQLMPFGC	heavy	564.795	569.366	8	5	Positive	14	NO
peptide5	LITQLMPFGC	heavy	564.795	700.406	8	5	Positive	14	NO
peptide5	LITQLMPFGC	light	561.788	227.175	8	5	Positive	14	NO
peptide5	LITQLMPFGC	light	561.788	423.17	8	5	Positive	14	NO
peptide5	LITQLMPFGC	light	561.788	501.278	8	5	Positive	14	NO
peptide5	LITQLMPFGC	light	561.788	554.21	8	5	Positive	14	NO
peptide5	LITQLMPFGC	light	561.788	569.366	8	5	Positive	14	NO
peptide5	LITQLMPFGC	light	561.788	700.406	8	5	Positive	14	NO
peptide6	GMNRRPILTI	heavy	393.236	240.167	5	5	Positive	10, 9	YES
peptide6	GMNRRPILTI	heavy	393.236	308.161	17	5	Positive	10, 9	YES
peptide6	GMNRRPILTI	heavy	393.236	356.687	13	5	Positive	10, 9	YES
peptide6	GMNRRPILTI	heavy	393.236	413.229	13	5	Positive	10, 9	YES
peptide6	GMNRRPILTI	heavy	393.236	469.771	5	5	Positive	10, 9	YES
peptide6	GMNRRPILTI	heavy	393.236	520.295	5	5	Positive	10, 9	YES
peptide6	GMNRRPILTI	light	390.897	233.15	5	5	Positive	10, 9	YES
peptide6	GMNRRPILTI	light	390.897	308.161	17	5	Positive	10, 9	YES
peptide6	GMNRRPILTI	light	390.897	356.687	13	5	Positive	10, 9	YES
peptide6	GMNRRPILTI	light	390.897	413.229	13	5	Positive	10, 9	YES
peptide6	GMNRRPILTI	light	390.897	469.771	5	5	Positive	10, 9	YES
peptide6	GMNRRPILTI	light	390.897	520.295	5	5	Positive	10, 9	YES
peptide7	VVVGAGGVGK	heavy	425.765	298.213	7	5	Positive	7	YES
peptide7	VVVGAGGVGK	heavy	425.765	326.697	7	5	Positive	7	YES
peptide7	VVVGAGGVGK	heavy	425.765	425.26	3	5	Positive	7	YES
peptide7	VVVGAGGVGK	heavy	425.765	426.271	3	5	Positive	7	YES
peptide7	VVVGAGGVGK	heavy	425.765	553.318	11	5	Positive	7	YES
peptide7	VVVGAGGVGK	heavy	425.765	652.387	7	5	Positive	7	YES
peptide7	VVVGAGGVGK	light	421.758	298.213	7	5	Positive	7	YES
peptide7	VVVGAGGVGK	light	421.758	322.69	7	5	Positive	7	YES
peptide7	VVVGAGGVGK	light	421.758	417.246	3	5	Positive	7	YES
peptide7	VVVGAGGVGK	light	421.758	426.271	3	5	Positive	7	YES
peptide7	VVVGAGGVGK	light	421.758	545.304	11	5	Positive	7	YES
peptide7	VVVGAGGVGK	light	421.758	644.373	7	5	Positive	7	YES
peptide8	VVGAGGVGK	heavy	376.231	212.149	17	5	Positive	6	NO
peptide8	VVGAGGVGK	heavy	376.231	256.166	9	5	Positive	6	NO
peptide8	VVGAGGVGK	heavy	376.231	326.697	9	5	Positive	6	NO
peptide8	VVGAGGVGK	heavy	376.231	425.26	13	5	Positive	6	NO
peptide8	VVGAGGVGK	heavy	376.231	553.318	5	5	Positive	6	NO
peptide8	VVGAGGVGK	heavy	376.231	652.387	9	5	Positive	6	NO
peptide8	VVGAGGVGK	light	372.224	204.134	17	5	Positive	6	NO
peptide8	VVGAGGVGK	light	372.224	256.166	9	5	Positive	6	NO
peptide8	VVGAGGVGK	light	372.224	322.69	9	5	Positive	6	NO
peptide8	VVGAGGVGK	light	372.224	417.246	13	5	Positive	6	NO
peptide8	VVGAGGVGK	light	372.224	545.304	5	5	Positive	6	NO
peptide8	VVGAGGVGK	light	372.224	644.373	9	5	Positive	6	NO
peptide9	KITDFGLAK	heavy	334.202	226.164	8	5	Positive	9	YES
peptide9	KITDFGLAK	heavy	334.202	272.173	0	5	Positive	9	YES
peptide9	KITDFGLAK	heavy	334.202	331.679	0	5	Positive	9	YES
peptide9	KITDFGLAK	heavy	334.202	339.248	4	5	Positive	9	YES
peptide9	KITDFGLAK	heavy	334.202	396.27	0	5	Positive	9	YES
peptide9	KITDFGLAK	heavy	334.202	458.261	4	5	Positive	9	YES
peptide9	KITDFGLAK	light	331.531	268.166	0	5	Positive	9	YES
peptide9	KITDFGLAK	light	331.531	331.234	0	5	Positive	9	YES
peptide9	KITDFGLAK	light	331.531	331.679	4	5	Positive	9	YES
peptide9	KITDFGLAK	light	331.531	388.255	0	5	Positive	9	YES
peptide9	KITDFGLAK	light	331.531	458.261	4	5	Positive	9	YES
peptide9	KITDFGLAK	light	331.531	218.15	8	5	Positive	9	YES
peptide10	TTAPSLSGK	heavy	435.245	203.103	11	5	Positive	5	NO
peptide10	TTAPSLSGK	heavy	435.245	274.14	7	5	Positive	5	NO
peptide10	TTAPSLSGK	heavy	435.245	298.678	15	5	Positive	5	NO
peptide10	TTAPSLSGK	heavy	435.245	299.18	15	5	Positive	5	NO
peptide10	TTAPSLSGK	heavy	435.245	334.197	11	5	Positive	5	NO
peptide10	TTAPSLSGK	heavy	435.245	596.349	11	5	Positive	5	NO
peptide10	TTAPSLSGK	heavy	435.245	667.386	7	5	Positive	5	NO
peptide10	TTAPSLSGK	light	431.237	203.103	11	5	Positive	5	NO
peptide10	TTAPSLSGK	light	431.237	274.14	7	5	Positive	5	NO
peptide10	TTAPSLSGK	light	431.237	291.166	15	5	Positive	5	NO
peptide10	TTAPSLSGK	light	431.237	294.671	15	5	Positive	5	NO
peptide10	TTAPSLSGK	light	431.237	330.19	11	5	Positive	5	NO
peptide10	TTAPSLSGK	light	431.237	588.335	11	5	Positive	5	NO
peptide10	TTAPSLSGK	light	431.237	659.372	7	5	Positive	5	NO
peptide11	AGGVGKSAL	heavy	383.73	285.156	5	5	Positive	4	NO
peptide11	AGGVGKSAL	heavy	383.73	291.19	9	5	Positive	4	NO
peptide11	AGGVGKSAL	heavy	383.73	319.701	5	5	Positive	4	NO
peptide11	AGGVGKSAL	heavy	383.73	482.305	5	5	Positive	4	NO
peptide11	AGGVGKSAL	heavy	383.73	628.341	5	5	Positive	4	NO
peptide11	AGGVGKSAL	heavy	383.73	638.395	9	5	Positive	4	NO
peptide11	AGGVGKSAL	heavy	383.73	695.416	9	5	Positive	4	NO
peptide11	AGGVGKSAL	light	380.222	285.156	5	5	Positive	4	NO
peptide11	AGGVGKSAL	light	380.222	287.682	9	5	Positive	4	NO
peptide11	AGGVGKSAL	light	380.222	316.192	5	5	Positive	4	NO
peptide11	AGGVGKSAL	light	380.222	475.288	5	5	Positive	4	NO
peptide11	AGGVGKSAL	light	380.222	628.341	5	5	Positive	4	NO
peptide11	AGGVGKSAL	light	380.222	631.377	9	5	Positive	4	NO
peptide11	AGGVGKSAL	light	380.222	688.399	9	5	Positive	4	NO
peptide12	SPNGTIRNIL	heavy	546.318	454.275	15	5	Positive	8	YES
peptide12	SPNGTIRNIL	heavy	546.318	477.262	11	5	Positive	8	YES
peptide12	SPNGTIRNIL	heavy	546.318	502.802	15	5	Positive	8	YES
peptide12	SPNGTIRNIL	heavy	546.318	522.347	19	5	Positive	8	YES
peptide12	SPNGTIRNIL	heavy	546.318	793.5	23	5	Positive	8	YES
peptide12	SPNGTIRNIL	heavy	546.318	907.543	23	5	Positive	8	YES
peptide12	SPNGTIRNIL	light	542.809	450.767	15	5	Positive	8	YES
peptide12	SPNGTIRNIL	light	542.809	477.262	11	5	Positive	8	YES
peptide12	SPNGTIRNIL	light	542.809	499.293	15	5	Positive	8	YES
peptide12	SPNGTIRNIL	light	542.809	515.33	19	5	Positive	8	YES
peptide12	SPNGTIRNIL	light	542.809	786.483	23	5	Positive	8	YES
peptide12	SPNGTIRNIL	light	542.809	900.526	23	5	Positive	8	YES
peptide13	ILDTAGHEEY	heavy	577.776	234.193	16	5	Positive	11	NO
peptide13	ILDTAGHEEY	heavy	577.776	487.239	12	5	Positive	11	NO
peptide13	ILDTAGHEEY	heavy	577.776	577.225	8	5	Positive	11	NO
peptide13	ILDTAGHEEY	heavy	577.776	578.326	8	5	Positive	11	NO
peptide13	ILDTAGHEEY	heavy	577.776	634.247	16	5	Positive	11	NO
peptide13	ILDTAGHEEY	heavy	577.776	806.332	16	5	Positive	11	NO
peptide13	ILDTAGHEEY	heavy	577.776	921.358	16	5	Positive	11	NO
peptide13	ILDTAGHEEY	light	574.267	227.175	16	5	Positive	11	NO
peptide13	ILDTAGHEEY	light	574.267	483.73	12	5	Positive	11	NO
peptide13	ILDTAGHEEY	light	574.267	571.309	8	5	Positive	11	NO
peptide13	ILDTAGHEEY	light	574.267	577.225	8	5	Positive	11	NO
peptide13	ILDTAGHEEY	light	574.267	634.247	16	5	Positive	11	NO
peptide13	ILDTAGHEEY	light	574.267	806.332	16	5	Positive	11	NO
peptide13	ILDTAGHEEY	light	574.267	921.359	16	5	Positive	11	NO
peptide14	ILDTAGKEEY	heavy	573.294	234.193	12	5	Positive	6	NO
peptide14	ILDTAGKEEY	heavy	573.294	482.757	12	5	Positive	6	NO
peptide14	ILDTAGKEEY	heavy	573.294	625.283	12	5	Positive	6	NO
peptide14	ILDTAGKEEY	heavy	573.294	696.32	16	5	Positive	6	NO
peptide14	ILDTAGKEEY	heavy	573.294	912.395	16	5	Positive	6	NO
peptide14	ILDTAGKEEY	heavy	573.294	964.506	12	5	Positive	6	NO
peptide14	ILDTAGKEEY	light	569.785	227.175	12	5	Positive	6	NO
peptide14	ILDTAGKEEY	light	569.785	479.248	12	5	Positive	6	NO
peptide14	ILDTAGKEEY	light	569.785	625.283	12	5	Positive	6	NO
peptide14	ILDTAGKEEY	light	569.785	696.32	16	5	Positive	6	NO
peptide14	ILDTAGKEEY	light	569.785	912.395	16	5	Positive	6	NO
peptide14	ILDTAGKEEY	light	569.785	957.489	12	5	Positive	6	NO
peptide15	ILDTAGLEEY	heavy	565.788	311.124	8	5	Positive	8, 7	YES
peptide15	ILDTAGLEEY	heavy	565.788	440.166	8	5	Positive	8, 7	YES
peptide15	ILDTAGLEEY	heavy	565.788	521.304	8	5	Positive	8, 7	YES
peptide15	ILDTAGLEEY	heavy	565.788	610.272	8	5	Positive	8, 7	YES
peptide15	ILDTAGLEEY	heavy	565.788	681.309	8	5	Positive	8, 7	YES
peptide15	ILDTAGLEEY	heavy	565.788	691.41	8	5	Positive	8, 7	YES
peptide15	ILDTAGLEEY	heavy	565.788	820.452	8	5	Positive	8, 7	YES
peptide15	ILDTAGLEEY	light	562.279	311.124	8	5	Positive	8, 7	YES
peptide15	ILDTAGLEEY	light	562.279	440.166	8	5	Positive	8, 7	YES
peptide15	ILDTAGLEEY	light	562.279	514.287	8	5	Positive	8, 7	YES
peptide15	ILDTAGLEEY	light	562.279	610.272	8	5	Positive	8, 7	YES
peptide15	ILDTAGLEEY	light	562.279	681.309	8	5	Positive	8, 7	YES
peptide15	ILDTAGLEEY	light	562.279	684.393	8	5	Positive	8, 7	YES
peptide15	ILDTAGLEEY	light	562.279	813.435	8	5	Positive	8, 7	YES
peptide16	ILDTAGREEY	heavy	587.297	234.193	12	5	Positive	6, 7	YES
peptide16	ILDTAGREEY	heavy	587.297	496.76	12	5	Positive	6, 7	YES
peptide16	ILDTAGREEY	heavy	587.297	578.326	12	5	Positive	6, 7	YES
peptide16	ILDTAGREEY	heavy	587.297	653.289	16	5	Positive	6, 7	YES
peptide16	ILDTAGREEY	heavy	587.297	724.326	20	5	Positive	6, 7	YES
peptide16	ILDTAGREEY	heavy	587.297	825.374	20	5	Positive	6, 7	YES
peptide16	ILDTAGREEY	heavy	587.297	940.401	16	5	Positive	6, 7	YES
peptide16	ILDTAGREEY	light	583.788	227.175	12	5	Positive	6, 7	YES
peptide16	ILDTAGREEY	light	583.788	493.251	12	5	Positive	6, 7	YES
peptide16	ILDTAGREEY	light	583.788	571.309	12	5	Positive	6, 7	YES
peptide16	ILDTAGREEY	light	583.788	653.289	16	5	Positive	6, 7	YES
peptide16	ILDTAGREEY	light	583.788	724.326	20	5	Positive	6, 7	YES
peptide16	ILDTAGREEY	light	583.788	825.374	20	5	Positive	6, 7	YES
peptide16	ILDTAGREEY	light	583.788	940.401	16	5	Positive	6, 7	YES
peptide17	KLVVVGACGV	heavy	475.79	667.45	8	5	Positive	13, 19	NO
peptide17	KLVVVGACGV	heavy	475.79	539.392	8	5	Positive	13, 19	NO
peptide17	KLVVVGACGV	heavy	475.79	511.258	8	5	Positive	13, 19	NO
peptide17	KLVVVGACGV	heavy	475.79	440.323	8	5	Positive	13, 19	NO
peptide17	KLVVVGACGV	heavy	475.79	412.189	8	5	Positive	13, 19	NO
peptide17	KLVVVGACGV	heavy	475.79	411.743	8	5	Positive	13, 19	NO
peptide17	KLVVVGACGV	light	472.784	667.45	8	5	Positive	13, 19	NO
peptide17	KLVVVGACGV	light	472.784	539.392	8	5	Positive	13, 19	NO
peptide17	KLVVVGACGV	light	472.784	505.244	8	5	Positive	13, 19	NO
peptide17	KLVVVGACGV	light	472.784	440.323	8	5	Positive	13, 19	NO
peptide17	KLVVVGACGV	light	472.784	408.736	8	5	Positive	13, 19	NO
peptide17	KLVVVGACGV	light	472.784	406.175	8	5	Positive	13, 19	NO
peptide18	LVVVGACGV	heavy	411.743	699.386	6	5	Positive	9	YES
peptide18	LVVVGACGV	heavy	411.743	539.355	2	5	Positive	9	YES
peptide18	LVVVGACGV	heavy	411.743	511.258	6	5	Positive	9	YES
peptide18	LVVVGACGV	heavy	411.743	412.189	2	5	Positive	9	YES
peptide18	LVVVGACGV	heavy	411.743	411.297	2	5	Positive	9	YES
peptide18	LVVVGACGV	heavy	411.743	284.131	2	5	Positive	9	YES
peptide18	LVVVGACGV	light	408.736	699.386	6	5	Positive	9	YES
peptide18	LVVVGACGV	light	408.736	539.355	2	5	Positive	9	YES
peptide18	LVVVGACGV	light	408.736	505.244	6	5	Positive	9	YES
peptide18	LVVVGACGV	light	408.736	411.297	2	5	Positive	9	YES
peptide18	LVVVGACGV	light	408.736	406.175	2	5	Positive	9	YES
peptide18	LVVVGACGV	light	408.736	278.117	2	5	Positive	9	YES
peptide19	KLVVVGADGV	heavy	481.799	839.499	13	5	Positive	7, 8	YES
peptide19	KLVVVGADGV	heavy	481.799	622.344	5	5	Positive	7, 8	YES
peptide19	KLVVVGADGV	heavy	481.799	539.392	13	5	Positive	7, 8	YES
peptide19	KLVVVGADGV	heavy	481.799	523.275	5	5	Positive	7, 8	YES
peptide19	KLVVVGADGV	heavy	481.799	440.323	13	5	Positive	7, 8	YES
peptide19	KLVVVGADGV	heavy	481.799	424.207	5	5	Positive	7, 8	YES
peptide19	KLVVVGADGV	light	478.792	839.499	13	5	Positive	7, 8	YES
peptide19	KLVVVGADGV	light	478.792	616.33	5	5	Positive	7, 8	YES
peptide19	KLVVVGADGV	light	478.792	539.392	13	5	Positive	7, 8	YES
peptide19	KLVVVGADGV	light	478.792	517.262	5	5	Positive	7, 8	YES
peptide19	KLVVVGADGV	light	478.792	440.323	13	5	Positive	7, 8	YES
peptide19	KLVVVGADGV	light	478.792	418.193	5	5	Positive	7, 8	YES
peptide20	LVVVGADGV	heavy	417.752	539.355	2	5	Positive	8	YES
peptide20	LVVVGADGV	heavy	417.752	523.275	2	5	Positive	8	YES
peptide20	LVVVGADGV	heavy	417.752	424.207	2	5	Positive	8	YES
peptide20	LVVVGADGV	heavy	417.752	411.297	2	5	Positive	8	YES
peptide20	LVVVGADGV	heavy	417.752	312.228	6	5	Positive	8	YES
peptide20	LVVVGADGV	heavy	417.752	296.148	2	5	Positive	8	YES
peptide20	LVVVGADGV	light	414.745	539.355	2	5	Positive	8	YES
peptide20	LVVVGADGV	light	414.745	517.262	2	5	Positive	8	YES
peptide20	LVVVGADGV	light	414.745	418.193	2	5	Positive	8	YES
peptide20	LVVVGADGV	light	414.745	411.297	2	5	Positive	8	YES
peptide20	LVVVGADGV	light	414.745	312.228	6	5	Positive	8	YES
peptide20	LVVVGADGV	light	414.745	290.135	2	5	Positive	8	YES
peptide21	IMQLMPFGC	heavy	523.249	617.315	6	5	Positive	13, 14	NO
peptide21	IMQLMPFGC	heavy	523.249	560.224	6	5	Positive	13, 14	NO
peptide21	IMQLMPFGC	heavy	523.249	486.274	6	5	Positive	13, 14	NO
peptide21	IMQLMPFGC	heavy	523.249	429.183	6	5	Positive	13, 14	NO
peptide21	IMQLMPFGC	heavy	523.249	373.19	22	5	Positive	13, 14	NO
peptide21	IMQLMPFGC	heavy	523.249	326.117	14	5	Positive	13, 14	NO
peptide21	IMQLMPFGC	light	520.242	617.315	6	5	Positive	13, 14	NO
peptide21	IMQLMPFGC	light	520.242	554.21	6	5	Positive	13, 14	NO
peptide21	IMQLMPFGC	light	520.242	486.274	6	5	Positive	13, 14	NO
peptide21	IMQLMPFGC	light	520.242	423.17	6	5	Positive	13, 14	NO
peptide21	IMQLMPFGC	light	520.242	373.19	22	5	Positive	13, 14	NO
peptide21	IMQLMPFGC	light	520.242	326.117	14	5	Positive	13, 14	NO
peptide22	LIMQLMPFGC	heavy	579.791	730.399	8	5	Positive	16	NO
peptide22	LIMQLMPFGC	heavy	579.791	673.308	8	5	Positive	16	NO
peptide22	LIMQLMPFGC	heavy	579.791	599.359	8	5	Positive	16	NO
peptide22	LIMQLMPFGC	heavy	579.791	560.224	8	5	Positive	16	NO
peptide22	LIMQLMPFGC	heavy	579.791	519.281	8	5	Positive	16	NO
peptide22	LIMQLMPFGC	heavy	579.791	486.274	8	5	Positive	16	NO
peptide22	LIMQLMPFGC	heavy	579.791	429.183	8	5	Positive	16	NO
peptide22	LIMQLMPFGC	light	576.784	730.399	8	5	Positive	16	NO
peptide22	LIMQLMPFGC	light	576.784	667.294	8	5	Positive	16	NO
peptide22	LIMQLMPFGC	light	576.784	599.359	8	5	Positive	16	NO
peptide22	LIMQLMPFGC	light	576.784	554.21	8	5	Positive	16	NO
peptide22	LIMQLMPFGC	light	576.784	516.274	8	5	Positive	16	NO
peptide22	LIMQLMPFGC	light	576.784	486.274	8	5	Positive	16	NO
peptide22	LIMQLMPFGC	light	576.784	423.17	8	5	Positive	16	NO
peptide23	GMNQRPILTI	heavy	575.33	910.493	16	5	Positive	9, 8	YES
peptide23	GMNQRPILTI	heavy	575.33	797.409	12	5	Positive	9, 8	YES
peptide23	GMNQRPILTI	heavy	575.33	563.388	12	5	Positive	9, 8	YES
peptide23	GMNQRPILTI	heavy	575.33	506.274	12	5	Positive	9, 8	YES
peptide23	GMNQRPILTI	heavy	575.33	481.299	12	5	Positive	9, 8	YES
peptide23	GMNQRPILTI	heavy	575.33	240.167	16	5	Positive	9, 8	YES
peptide23	GMNQRPILTI	light	571.821	910.493	16	5	Positive	9, 8	YES
peptide23	GMNQRPILTI	light	571.821	797.409	12	5	Positive	9, 8	YES
peptide23	GMNQRPILTI	light	571.821	556.37	12	5	Positive	9, 8	YES
peptide23	GMNQRPILTI	light	571.821	506.274	16	5	Positive	9, 8	YES
peptide23	GMNQRPILTI	light	571.821	477.79	12	5	Positive	9, 8	YES
peptide23	GMNQRPILTI	light	571.821	233.15	12	5	Positive	9, 8	YES
peptide24	GMNWRPILTI	heavy	604.34	645.293	21	5	Positive	13, 12	NO
peptide24	GMNWRPILTI	heavy	604.34	563.388	13	5	Positive	13, 12	NO
peptide24	GMNWRPILTI	heavy	604.34	535.284	13	5	Positive	13, 12	NO
peptide24	GMNWRPILTI	heavy	604.34	510.309	9	5	Positive	13, 12	NO
peptide24	GMNWRPILTI	heavy	604.34	240.167	13	5	Positive	13, 12	NO
peptide24	GMNWRPILTI	heavy	604.34	968.513	13	5	Positive	13, 12	NO
peptide24	GMNWRPILTI	light	600.832	968.514	13	5	Positive	13, 12	NO
peptide24	GMNWRPILTI	light	600.832	645.293	21	5	Positive	13, 12	NO
peptide24	GMNWRPILTI	light	600.832	556.37	13	5	Positive	13, 12	NO
peptide24	GMNWRPILTI	light	600.832	535.284	13	5	Positive	13, 12	NO
peptide24	GMNWRPILTI	light	600.832	506.801	9	5	Positive	13, 12	NO
peptide24	GMNWRPILTI	light	600.832	233.15	13	5	Positive	13, 12	NO
peptide25	VVVGACGVGK	heavy	448.759	698.375	7	5	Positive	7	YES
peptide25	VVVGACGVGK	heavy	448.759	599.306	15	5	Positive	7	YES
peptide25	VVVGACGVGK	heavy	448.759	542.285	11	5	Positive	7	YES
peptide25	VVVGACGVGK	heavy	448.759	349.691	11	5	Positive	7	YES
peptide25	VVVGACGVGK	heavy	448.759	298.213	7	5	Positive	7	YES
peptide25	VVVGACGVGK	light	444.752	690.36	7	5	Positive	7	YES
peptide25	VVVGACGVGK	light	444.752	591.292	15	5	Positive	7	YES
peptide25	VVVGACGVGK	light	444.752	534.27	11	5	Positive	7	YES
peptide25	VVVGACGVGK	light	444.752	345.684	11	5	Positive	7	YES
peptide25	VVVGACGVGK	light	444.752	298.212	7	5	Positive	7	YES
peptide26	VVGACGVGK	heavy	399.225	698.375	14	5	Positive	6	NO
peptide26	VVGACGVGK	heavy	399.225	599.306	6	5	Positive	6	NO
peptide26	VVGACGVGK	heavy	399.225	471.248	18	5	Positive	6	NO
peptide26	VVGACGVGK	heavy	399.225	349.691	6	5	Positive	6	NO
peptide26	VVGACGVGK	heavy	399.225	212.148	18	5	Positive	6	NO
peptide26	VVGACGVGK	light	395.218	690.36	14	5	Positive	6	NO
peptide26	VVGACGVGK	light	395.218	591.292	6	5	Positive	6	NO
peptide26	VVGACGVGK	light	395.218	463.233	18	5	Positive	6	NO
peptide26	VVGACGVGK	light	395.218	345.684	6	5	Positive	6	NO
peptide26	VVGACGVGK	light	395.218	204.134	18	5	Positive	6	NO
peptide27	VVVGADGVGK	heavy	454.768	710.392	8	5	Positive	6	NO
peptide27	VVVGADGVGK	heavy	454.768	611.324	12	5	Positive	6	NO
peptide27	VVVGADGVGK	heavy	454.768	554.302	16	5	Positive	6	NO
peptide27	VVVGADGVGK	heavy	454.768	355.7	8	5	Positive	6	NO
peptide27	VVVGADGVGK	heavy	454.768	298.213	8	5	Positive	6	NO
peptide27	VVVGADGVGK	light	450.761	702.378	8	5	Positive	6	NO
peptide27	VVVGADGVGK	light	450.761	603.31	12	5	Positive	6	NO
peptide27	VVVGADGVGK	light	450.761	546.288	16	5	Positive	6	NO
peptide27	VVVGADGVGK	light	450.761	351.693	8	5	Positive	6	NO
peptide27	VVVGADGVGK	light	450.761	298.212	8	5	Positive	6	NO
peptide28	VVGADGVGK	heavy	405.234	710.392	10	5	Positive	5	NO
peptide28	VVGADGVGK	heavy	405.234	611.324	10	5	Positive	5	NO
peptide28	VVGADGVGK	heavy	405.234	483.265	18	5	Positive	5	NO
peptide28	VVGADGVGK	heavy	405.234	355.7	10	5	Positive	5	NO
peptide28	VVGADGVGK	heavy	405.234	212.148	18	5	Positive	5	NO
peptide28	VVGADGVGK	light	401.227	702.378	10	5	Positive	5	NO
peptide28	VVGADGVGK	light	401.227	603.31	10	5	Positive	5	NO
peptide28	VVGADGVGK	light	401.227	475.251	18	5	Positive	5	NO
peptide28	VVGADGVGK	light	401.227	351.693	10	5	Positive	5	NO
peptide28	VVGADGVGK	light	401.227	204.134	18	5	Positive	5	NO
peptide29	KITDFGRAK	heavy	348.541	586.355	16	5	Positive	7	YES
peptide29	KITDFGRAK	heavy	348.541	458.261	8	5	Positive	7	YES
peptide29	KITDFGRAK	heavy	348.541	401.719	8	5	Positive	7	YES
peptide29	KITDFGRAK	heavy	348.541	343.234	4	5	Positive	7	YES
peptide29	KITDFGRAK	heavy	348.541	293.681	4	5	Positive	7	YES
peptide29	KITDFGRAK	light	345.87	578.341	16	5	Positive	7	YES
peptide29	KITDFGRAK	light	345.87	454.253	8	5	Positive	7	YES
peptide29	KITDFGRAK	light	345.87	397.711	8	5	Positive	7	YES
peptide29	KITDFGRAK	light	345.87	343.234	4	5	Positive	7	YES
peptide29	KITDFGRAK	light	345.87	289.674	4	5	Positive	7	YES
peptide30	TTAPFLSGK	heavy	465.263	727.423	8	5	Positive	8	YES
peptide30	TTAPFLSGK	heavy	465.263	656.386	8	5	Positive	8	YES
peptide30	TTAPFLSGK	heavy	465.263	364.215	12	5	Positive	8	YES
peptide30	TTAPFLSGK	heavy	465.263	328.697	16	5	Positive	8	YES
peptide30	TTAPFLSGK	heavy	465.263	274.14	8	5	Positive	8	YES
peptide30	TTAPFLSGK	heavy	465.263	203.103	8	5	Positive	8	YES
peptide30	TTAPFLSGK	light	461.256	719.409	8	5	Positive	8	YES
peptide30	TTAPFLSGK	light	461.256	648.371	8	5	Positive	8	YES
peptide30	TTAPFLSGK	light	461.256	360.208	12	5	Positive	8	YES
peptide30	TTAPFLSGK	light	461.256	324.689	16	5	Positive	8	YES
peptide30	TTAPFLSGK	light	461.256	274.14	8	5	Positive	8	YES
peptide30	TTAPFLSGK	light	461.256	203.103	8	5	Positive	8	YES
peptide31	AVGVGKSAL	heavy	404.754	638.395	6	5	Positive	6	NO
peptide31	AVGVGKSAL	heavy	404.754	581.373	10	5	Positive	6	NO
peptide31	AVGVGKSAL	heavy	404.754	482.305	10	5	Positive	6	NO
peptide31	AVGVGKSAL	heavy	404.754	369.235	6	5	Positive	6	NO
peptide31	AVGVGKSAL	heavy	404.754	327.203	2	5	Positive	6	NO
peptide31	AVGVGKSAL	heavy	404.754	228.134	10	5	Positive	6	NO
peptide31	AVGVGKSAL	light	401.245	631.377	6	5	Positive	6	NO
peptide31	AVGVGKSAL	light	401.245	574.356	10	5	Positive	6	NO
peptide31	AVGVGKSAL	light	401.245	475.288	10	5	Positive	6	NO
peptide31	AVGVGKSAL	light	401.245	365.726	6	5	Positive	6	NO
peptide31	AVGVGKSAL	light	401.245	327.203	2	5	Positive	6	NO
peptide31	AVGVGKSAL	light	401.245	228.134	10	5	Positive	6	NO
peptide32	SPNGTIQNIL	heavy	532.296	812.39	10	5	Positive	8	YES
peptide32	SPNGTIQNIL	heavy	532.296	607.389	6	5	Positive	8	YES
peptide32	SPNGTIQNIL	heavy	532.296	463.241	6	5	Positive	8	YES
peptide32	SPNGTIQNIL	heavy	532.296	440.254	10	5	Positive	8	YES
peptide32	SPNGTIQNIL	heavy	532.296	406.698	10	5	Positive	8	YES
peptide32	SPNGTIQNIL	heavy	532.296	366.246	6	5	Positive	8	YES
peptide32	SPNGTIQNIL	heavy	532.296	252.203	10	5	Positive	8	YES
peptide32	SPNGTIQNIL	light	528.788	812.39	10	5	Positive	8	YES
peptide32	SPNGTIQNIL	light	528.788	600.371	6	5	Positive	8	YES
peptide32	SPNGTIQNIL	light	528.788	463.24	6	5	Positive	8	YES
peptide32	SPNGTIQNIL	light	528.788	436.745	10	5	Positive	8	YES
peptide32	SPNGTIQNIL	light	528.788	406.699	10	5	Positive	8	YES
peptide32	SPNGTIQNIL	light	528.788	359.229	6	5	Positive	8	YES
peptide32	SPNGTIQNIL	light	528.788	245.186	10	5	Positive	8	YES
peptide33	SGYIEAEVIPAETGQET	heavy	370.56	477.802	9	5	Positive	10	NO
peptide33	SGYIEAEVIPAETGQET	heavy	370.56	442.284	9	5	Positive	10	NO
peptide33	SGYIEAEVIPAETGQET	heavy	370.56	373.754	1	5	Positive	10	NO
peptide33	SGYIEAEVIPAETGQET	heavy	370.56	364.173	5	5	Positive	10	NO
peptide33	SGYIEAEVIPAETGQET	heavy	370.56	227.114	17	5	Positive	10	NO
peptide33	SGYIEAEVIPAETGQET	light	367.889	473.795	9	5	Positive	10	NO
peptide33	SGYIEAEVIPAETGQET	light	367.889	438.277	9	5	Positive	10	NO
peptide33	SGYIEAEVIPAETGQET	light	367.889	369.747	1	5	Positive	10	NO
peptide33	SGYIEAEVIPAETGQET	light	367.889	364.173	5	5	Positive	10	NO
peptide33	SGYIEAEVIPAETGQET	light	367.889	227.114	17	5	Positive	10	NO
