# Supplementary material for: Direct Detection and Quantification of Neoantigens
Source: Oxford University Press journal article supplement (doi:10.1158/2326-6066.cir-19-0107), 2019-09-16
Supplement: 23266066cir190107-sup-217206_2_supp_5812595_pyrlbt.xlsx [file 23266066cir190107-sup-217206_2_supp_5812595_pyrlbt.xlsx]

## Sheet: Sheet1
Supplementary Table S4. MANA-SRM quantitative performance measured with monomers.
Peptide spiked in		Monomer HLA Subtype	10 ng monomer spike-in	30 ng monomer spike-in	90 ng monomer spike-in	270 ng monomer spike-in	810 ng monomer spike-in	average
2: KLVVVGAGGV	MANA-SRM for MHC Class I molecules (captured with W6/32 antibody)	HLA-A2	0.720486	0.697264	0.765702	0.716114	0.750861	0.730±0.028
10: TTAPSLSGK		HLA-A3	0.717003	0.728035	0.714161	0.743592	0.753527	0.731±0.017
12: SPNGTIRNIL		HLA-B7	0.933172	0.709866	0.73778	0.724684	0.766026	0.774±0.091
25: GMNWRPILTI		HLA-A2	0.787346	0.720216	0.713492	0.75798	0.711131	0.738±0.033
31: TTAPFLSGK		HLA-A3	0.736437	0.699131	0.749838	0.741087	0.742723	0.734±0.020
33: SPNGTIQNIL		HLA-B7	0.723035	0.749595	0.772404	0.754944	0.742997	0.749±0.018
PVSKMRMATPLLMQA	MANA-SRM for MHC Class II molecules (captured with L243 antibody)	HLA-DR	0.733	0.80208	0.608644	0.696897	0.7286	0.714±0.070
SGYIEAEVIPAETGQET​		HLA-DR	0.785789	0.721	0.776	0.657348	0.711255	0.730±0.052
Different amount of monomers were spiked into 3 mg of SW480 lysate
